# Supplementary material for: Is It Time to Commit to a Process to Re-Evaluate Oncology Drugs? A Descriptive Analysis of Systemic Therapies for Solid Tumour Indications Reviewed in Canada from 2017 to 2021
Source: MDPI journal article supplement (doi:10.3390/curroncol29030156), 2022-03-10
Supplement: s1 [file s1]

**Table S1.** List of all drugs for solid tumour indications approved by Health Canada from January 1, 2017 to October 31, 2021.

| Generic drug name          | Standard, Priority, or Accelerated NOC/c review | Year of Health Canada Approval | Pivotal Trial Design | Indication                                  | ESMO MCBS Score | CADTH Recommendation |
|----------------------------|-------------------------------------------------|--------------------------------|----------------------|---------------------------------------------|-----------------|----------------------|
| Atezolizumab               | Standard                                        | 2021                           | RCT                  | NSCLC (1L metastatic) (PD-L1)               | 5               | No submission        |
| Brigatinib                 | Standard                                        | 2021                           | RCT                  | NSCLC (ALK+)(1L)                            | 3               | Positive             |
| Encorafenib + binimetinib  | Standard                                        | 2021                           | RCT                  | Metastatic melanoma (BRAF)                  | 4               | Positive             |
| Encorafenib + cetuximab    | Standard                                        | 2021                           | RCT                  | Colorectal cancer (BRAF)                    | Not available   | Positive             |
| Infigratinib phosphate     | NOC/c                                           | 2021                           | Phase II             | Bile duct FGFR2+ (previously treated)       | 3               | No submission        |
| Lorlatinib (monotherapy)   | Priority                                        | 2021                           | RCT                  | NSCLC ALK+ (1L)                             | 4               | Positive (draft)     |
| Lurbinectedin              | NOC/c                                           | 2021                           | Phase II             | Small cell lung cancer (previously treated) | 2               | No submission        |
| Neratinib + capecitabine   | Standard                                        | 2021                           | RCT                  | Metastatic Breast cancer (HER2)             | 1               | No submission        |
| Nivolumab                  | Priority                                        | 2021                           | RCT                  | adjuvant esophageal cancer                  | A               | Ongoing              |
| Nivolumab + ipilimumab     | Standard                                        | 2021                           | RCT                  | malignant pleural mesothelioma              | 3               | Positive             |
| Nivolumab + ipilimumab     | NOC/c                                           | 2021                           | Phase II             | Colorectal cancer (MSI-HI)                  | 3               | No submission        |
| Osimertinib                | Priority                                        | 2021                           | RCT                  | NSCLC (adjuvant)                            | A               | Positive (draft)     |
| Pembrolizumab + chemo      | Priority                                        | 2021                           | RCT                  | esophageal cancer (HER2-)                   | Not available   | Positive (draft)     |
| Pemigatinib                | Standard                                        | 2021                           | Phase II             | Bile duct FGFR2+ (previously treated)       | 3               | Negative (draft)     |
| Pertuzumab, trastuzumab    | Standard                                        | 2021                           | RCT                  | Neoadjuvant EBC (HER2+)                     | C               | Negative (draft)     |
| Pralsetinib                | NOC/c                                           | 2021                           | Phase II             | RET+ NSCLC                                  | 3               | No submission        |
| Selpercatinib              | NOC/c                                           | 2021                           | Phase II             | RET+ NSCLC, thyroid                         | 3               | Ongoing              |
| Sotorasib                  | NOC/c                                           | 2021                           | Phase II             | NSCLC KRAS+ (previously treated)            | Not available   | No submission        |
| Tepotinib                  | NOC/c                                           | 2021                           | Phase II             | NSCLC (MET+)                                | 3               | Ongoing              |
| Trastuzumab deruxtecan     | NOC/c                                           | 2021                           | Phase II             | Breast cancer                               | 2               | No submission        |
| Alpelisib                  | Standard                                        | 2020                           | RCT                  | Breast cancer (PIK3CA, HER2-)               | 3               | Negative (draft)     |
| Atezolizumab + bevacizumab | Standard                                        | 2020                           | RCT                  | Non-squamous NSCLC                          | 3               | Negative             |
| Atezolizumab + bevacizumab | Priority                                        | 2020                           | RCT                  | hepatocellular carcinoma                    | 5               | Positive             |
| Avelumab                   | Priority                                        | 2020                           | RCT                  | urothelial carcinoma (maintenance post 1L)  | 4               | Positive             |

|                                        |          |      |                |                                             |                 |               |
|----------------------------------------|----------|------|----------------|---------------------------------------------|-----------------|---------------|
| Durvalumab                             | Standard | 2020 | RCT            | Extensive-stage small cell lung cancer      | 3               | Positive      |
| Entrectinib                            | Standard | 2020 | Phase II)      | NSCLC (ROS-1)                               | 3               | Positive      |
| Entrectinib                            | NOC/c    | 2020 | Phase II       | NTRK fusion (tumour agnostic)               | 3               | No submission |
| Niraparib (monotherapy)                | Priority | 2020 | RCT            | Ovarian cancer (1L)                         | 3               | Positive      |
| Nivolumab + ipilimumab                 | Standard | 2020 | RCT            | NSCLC (PD-L1)                               | 2               | No submission |
| Nivolumab + ipilimumab + chemo         | Priority | 2020 | RCT            | NSCLC (1L)                                  | 4               | Positive      |
| Olaparib                               | Priority | 2020 | RCT            | pancreas                                    | 3               | No submission |
| Olaparib (monotherapy)                 | Priority | 2020 | RCT            | mCRPC                                       | 3               | Positive      |
| Pembrolizumab                          | Standard | 2020 | RCT            | Head & neck (PD-L1)                         | 4               | Positive      |
| Pembrolizumab                          | NOC/c    | 2020 | Phase II       | bladder cancer                              | 3               | No submission |
| Pembrolizumab                          | Standard | 2020 | RCT            | NSCLC (PD-L1 > 1%)                          | 5               | No submission |
| Ribociclib + AI                        | Standard | 2020 | RCT            | Breast (HR+, HER2-) (pre-menopausal)        | 5               | Positive      |
| Ribociclib + fulvestrant               | Standard | 2020 | RCT            | Breast (HR+, HER2-)                         | 4               | Positive      |
| Ripretinib                             | Priority | 2020 | RCT            | GIST                                        | 3               | Ongoing       |
| Sonidegib                              | Standard | 2020 | phase II (RCT) | Basal cell carcinoma                        | Not available   | Negative      |
| Tucatinib + trastuzumab + capecitabine | Priority | 2020 | phase II (RCT) | Breast cancer (HER2+)                       | 3               | Positive      |
| Abemaciclib                            | Standard | 2019 | RCT            | Breast cancer (HER2-)                       | 3 (AI), 4 (FUL) | Positive      |
| Atezolizumab + chemo                   | Priority | 2019 | RCT            | Extensive-stage small cell lung cancer      | 3               | Negative      |
| Atezolizumab + chemo                   | NOC/c    | 2019 | RCT            | Triple negative breast cancer (PD-L1)       | 3               | Withdrawn     |
| Cabozantinib                           | Standard | 2019 | RCT            | Hepatocellular carcinoma                    | 3               | Positive      |
| Cemiplimab                             | NOC/c    | 2019 | Phase II       | Adv Cutaneous Squamous Cell Carcinoma       | 3               | Positive      |
| Dacomitinib                            | Standard | 2019 | RCT            | NSCLC EGFR+                                 | 3               | Positive      |
| Erdafitinib                            | NOC/c    | 2019 | Phase II       | Urothelial cancer (FGFR)                    | 1               | No submission |
| Larotrectinib                          | NOC/c    | 2019 | Phase II       | NTRK fusion (tumour agnostic)               | 3               | Positive      |
| Lorlatinib (monotherapy)               | NOC/c    | 2019 | Phase II       | NSCLC ALK+ (post crizotinib + another ALKi) | 3               | Negative      |

|                                       |          |      |          |                                         |               |                |
|---------------------------------------|----------|------|----------|-----------------------------------------|---------------|----------------|
| Lutetium (177Lu) oxodotretotide       | Priority | 2019 | RCT      | Neuroendocrine tumours                  | 4             | Positive       |
| Neratinib (monotherapy)               | Standard | 2019 | RCT      | Extended Adjuvant Breast cancer (HER2)  | A             | Negative       |
| Niraparib (monotherapy)               | Standard | 2019 | RCT      | Ovarian cancer (maintenance post-chemo) | 3             | Positive       |
| Olaparib                              | Priority | 2019 | RCT      | maintenance for 1L ovarian cancer       | 4             | Positive       |
| Pembrolizumab                         | Standard | 2019 | RCT      | Adjuvant melanoma                       | A             | Positive       |
| Pembrolizumab                         | Standard | 2019 | Phase II | urothelial carcinoma (PD-L1)            | 3             | Negative       |
| Pembrolizumab                         | NOC/c    | 2019 | RCT      | MSI HI endometrial or colorectal cancer | 4             | Positive (CRC) |
| Pembrolizumab + axitinib              | Standard | 2019 | RCT      | Renal cell carcinoma                    | 4             | Positive       |
| Pembrolizumab + chemo                 | Standard | 2019 | RCT      | Squamous NSCLC                          | 4             | Positive       |
| Pembrolizumab + lenvatinib            | NOC/c    | 2019 | Phase II | Endometrial cancer (not MSI HI)         | 3             | Ongoing        |
| Pembrolizumab + pemetrexed + chemo    | Standard | 2019 | RCT      | NSCLC (non-squamous) (1L)               | 4             | Positive       |
| Talazoparib                           | Standard | 2019 | RCT      | Breast cancer (HER2-)                   | 4             | No submission  |
| Tipiracil hydrochloride, trifluridine | Priority | 2019 | RCT      | Gastic cancer                           | 3             | Positive       |
| Trastuzumab emtansine                 | Priority | 2019 | RCT      | Adjuvant breast cancer (HER2+)          | A             | Positive       |
| Alectinib                             | Priority | 2018 | RCT      | NSCLC (ALK+)(1L)                        | 4             | Positive       |
| Atezolizumab                          | Standard | 2018 | RCT      | NSCLC (2nd line)                        | 5             | Positive       |
| Avelumab                              | NOC/c    | 2018 | Phase II | Urothelial carcinoma (post chemo)       | Not available | No submission  |
| Bevacizumab                           | Standard | 2018 | RCT      | Glioblastoma                            | Not available | No submission  |
| Brigatinib                            | NOC/c    | 2018 | phase II | NSCLC (ALK+) (progressed)               | 3             | Negative       |
| Cabozantinib                          | Standard | 2018 | RCT      | Renal cell carcinoma                    | 3             | Positive       |
| Dabrafenib + trametinib               | Priority | 2018 | RCT      | Adjuvant melanoma (BRAF)                | A             | Positive       |
| Dabrafenib + trametinib               | Priority | 2018 | Phase II | NSCLC BRAF                              | 2             | Positive       |
| Dinutuximab                           | Standard | 2018 | RCT      | Neuroblastoma                           | A             | Positive       |
| Durvalumab                            | NOC/c    | 2018 | RCT      | NSCLC (maintenance post chemo)          | 4             | Positive       |
| Lenvatinib                            | Standard | 2018 | RCT      | hepatocellular carcinoma                | Not available | Positive       |
| Nivolumab                             | NOC/c    | 2018 | Phase II | hepatocellular carcinoma                | Not available | Negative       |
| Nivolumab                             | Standard | 2018 | RCT      | adjuvant melanoma                       | A             | Positive       |

|                                       |          |      |                |                                       |               |               |
|---------------------------------------|----------|------|----------------|---------------------------------------|---------------|---------------|
| Nivolumab + ipilimumab                | Priority | 2018 | RCT            | Renal cell carcinoma                  | 4             | Positive      |
| Olaparib (monotherapy)                | Priority | 2018 | RCT            | breast (BRCA+) (previously treated)   | 4             | No submission |
| Osimertinib                           | Priority | 2018 | RCT            | NSCLC (1L)(EGFR+)                     | 4             | Positive      |
| Pertuzumab + trastuzumab              | Standard | 2018 | RCT            | Breast (HER2+) EBC                    | A             | Negative      |
| Ribociclib + AI                       | Standard | 2018 | RCT            | Breast (HR+, HER2-) (post-menopausal) | 3             | Positive      |
| Tipiracil hydrochloride, trifluridine | Priority | 2018 | RCT            | Colorectal cancer                     | 3             | Negative      |
| Atezolizumab                          | NOC/c    | 2017 | Phase II       | urothelial carcinoma                  | 3             | No submission |
| Avelumab                              | NOC/c    | 2017 | Phase II       | Merkel Cell Carcinoma (progression)   | 3             | Positive      |
| Crizotinib                            | Standard | 2017 | Phase II       | NSCLC (ROS-1)                         | 3             | Positive      |
| Durvalumab                            | NOC/c    | 2017 | Phase II       | Urothelial cancer (after progression) | Not available | No submission |
| Eribulin mesylate                     | Standard | 2017 | RCT            | Sarcoma                               | 3             | No submission |
| Erlotinib hydrochloride               | Standard | 2017 | RCT            | NSCLC (EGFR) (maintenance post chemo) | 1             | No submission |
| Lenvatinib + everolimus               | Standard | 2017 | phase II (RCT) | Renal cell carcinoma (progressed)     | 4             | Negative      |
| Necitumumab + chemo                   | Standard | 2017 | RCT            | NSCLC                                 | 1             | No submission |
| Nivolumab                             | Priority | 2017 | RCT            | Head & neck                           | 5             | Positive      |
| Olaratumab                            | NOC/c    | 2017 | phase II (RCT) | Soft tissue sarcoma                   | Not available | Positive      |
| Palbociclib + fulvestrant             | Standard | 2017 | RCT            | Breast (HR+, HER2-)                   | 4             | Positive      |
| Panitumumab                           | Standard | 2017 | RCT            | Colorectal cancer (wild type RAS)     | 3             | Negative      |
| Pembrolizumab (monotherapy)           | Priority | 2017 | RCT            | urothelial carcinoma (post chemo)     | 4             | Positive      |
| Regorafenib                           | Priority | 2017 | RCT            | hepatocellular carcinoma (progressed) | 4             | Positive      |

Abbreviations: ESMO-MCBS, European Society of Medical Oncology-Magnitude of Clinical Benefit Scale; GI, gastrointestinal; GU, genitourinary; NOC, Notice of Compliance; NOC/c, Notice of Compliance with conditions; NSCLC, non-small cell lung cancer; RCT, randomized controlled trial
